# Supplementary material for: Synthesis and NOx sensing evaluation of hollow/porous La0.8Sr0.2MnO3 microspheres
Source: Royal Society of Chemistry journal article supplement (doi:10.1039/c6ra08587c), 2016-01-01
Supplement: c6ra08587c1.pdf [file c6ra08587c1.pdf]

## Supporting Information

# Synthesis and NO<sub>x</sub> Sensing Evaluation of Hollow/Porous La<sub>0.8</sub>Sr<sub>0.2</sub>MnO<sub>3</sub> Microspheres

*Satoshi Suehiro\*, Hajime Okawa and Seiji Takahashi*

*Japan Fine Ceramics Center (JFCC), Material Research and Development Laboratory  
2-4-1 Mutuno, Atsuta-ku, Nagoya 456-8587, Japan*

Email: [s\\_suehiro@jfcc.or.jp](mailto:s_suehiro@jfcc.or.jp)

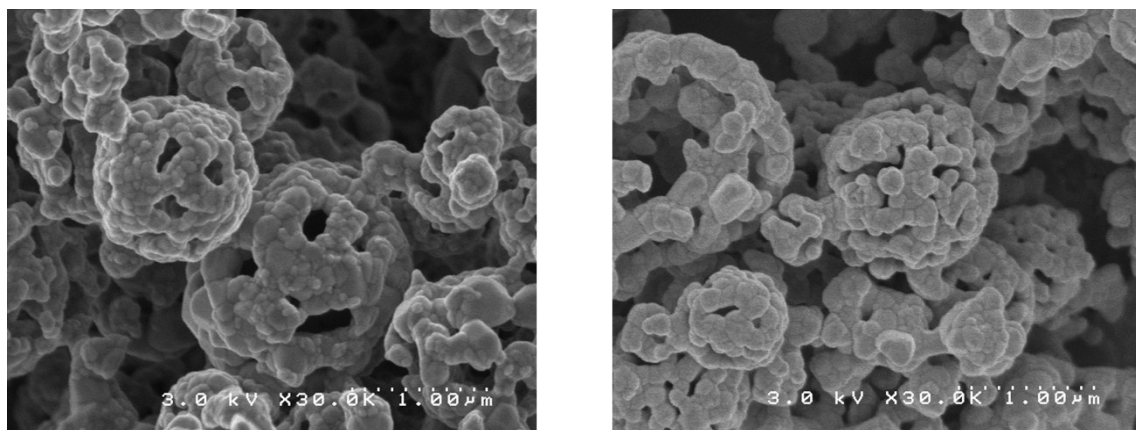

Figure S1 XRD and SEM image of porous hollow  $\text{La}_{0.8}\text{Sr}_{0.2}\text{CoO}_3$  (right) and  $\text{La}_{0.8}\text{Sr}_{0.2}\text{FeO}_3$  particles (Left).

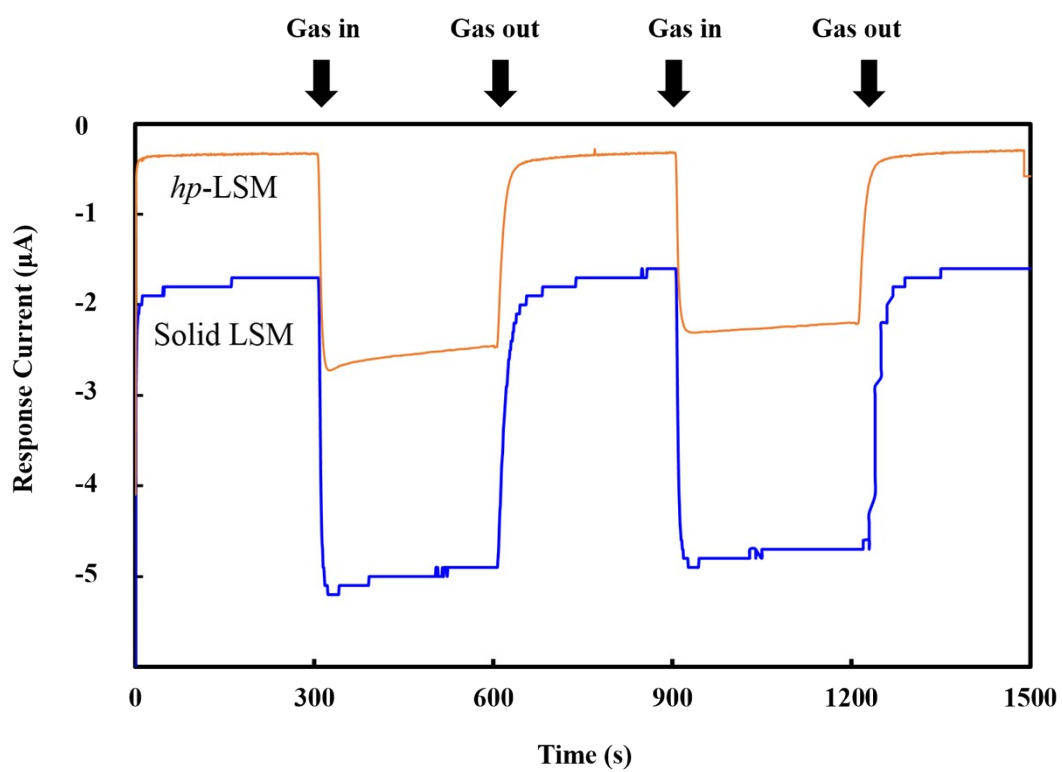

Figure S2 Response transient to 500 ppm nitric oxide (NO) gas of sensors using *hp*-LSM or solid sphere LSM electrodes
